# Differential expression and prognostic value of the chemokine receptor CXCR4 in bronchopulmonary neuroendocrine neoplasms

Daniel Kaemmerer<sup>1,\*</sup>, Christiane Reimann<sup>2,\*</sup>, Elisa Specht<sup>2</sup>, Ralph M. Wirtz<sup>3</sup>, Manal Sayeg<sup>4</sup>, Richard P. Baum<sup>5</sup>, Stefan Schulz<sup>2</sup> and Amelie Lupp<sup>2</sup>

<sup>1</sup> Department of General and Visceral Surgery, Zentralklinik Bad Berka, Bad Berka, Germany

<sup>2</sup> Department of Pharmacology and Toxicology, Jena University Hospital, Jena, Germany

<sup>3</sup> Stratifyer Molecular Pathology GmbH, Cologne, Germany

<sup>4</sup> Department of Internal Medicine, Gastroenterology and Endocrinology, Zentralklinik Bad Berka, Bad Berka, Germany

<sup>5</sup> Department of Molecular Radiotherapy and Molecular Imaging, Center for PET/CT, Zentralklinik Bad Berka, Bad Berka, Germany

\* These authors contributed equally to this work

**Correspondence to:** Daniel Kaemmerer, **email:** Daniel.Kaemmerer@zentraklinik.de

**Keywords:** lung cancer, neuroendocrine neoplasm (NEN), small cell lung cancer (SCLC), CXCR4, immunohistochemistry (IHC)

**Received:** November 01, 2014

**Accepted:** December 24, 2014

**Published:** December 30, 2014

This is an open-access article distributed under the terms of the Creative Commons Attribution License, which permits unrestricted use, distribution, and reproduction in any medium, provided the original author and source are credited.

## ABSTRACT

**Introduction:** For many tumors, the overexpression of the chemokine receptor CXCR4 is associated with increased malignancy and poor patient outcomes. However, comprehensive data for neuroendocrine neoplasms of the lung are still lacking.

**Methods:** CXCR4 expression was evaluated in a panel of bronchopulmonary neuroendocrine neoplasms (BP-NEN) comprising typical carcinoids (n = 26), atypical carcinoids (n = 30), and small cell lung cancers (SCLC, n = 34). Samples were analyzed by immunohistochemistry using the novel monoclonal rabbit anti-human CXCR4 antibody UMB-2 and by qRT-PCR. The expression was correlated with clinical data and overall patient survival.

**Results:** CXCR4 was predominantly localized at the plasma membrane of the tumor cells. CXCR4 was expressed with a high intensity in almost all of the 30 SCLC samples. In contrast, it was detected infrequently and with low intensity in the typical carcinoid and atypical carcinoid samples. There was a significant correlation between the immunohistochemistry and qRT-PCR data. Additionally, there was a significant negative relationship between CXCR4 expression and overall survival.

**Conclusions:** With increasing malignancy, BP-NEN clearly differ in the extent of CXCR4 expression. As in other tumor entities, CXCR4 overexpression significantly correlates with negative patient outcome. Due to its particular high expression rate in SCLC, CXCR4 may serve as a promising new target for diagnostic and pharmacological intervention as well as for peptide receptor-based radionuclide therapy.

## INTRODUCTION

Neuroendocrine neoplasms (NEN) can be found in many organs and represent a heterogeneous group of malignancies deriving from the neuroendocrine system. Two thirds of the cases occur in the gastroenteropancreatic

tract[1]. Clinically, NEN are commonly classified into functioning and non-functioning tumors, depending on the hormone secretion[2]. One quarter of all NEN are located in the lung. The growing importance of bronchopulmonary neuroendocrine neoplasms (BP-NEN) is further underlined by a distinct increase in the incidence of BP-NEN in recent years[3]

BP-NEN can be classified into two subgroups with four different entities. Typical carcinoids (TC) and atypical carcinoids (ATC) are well-differentiated neuroendocrine tumors of the lung. Small cell lung cancers (SCLC) and large cell neuroendocrine carcinomas (LCNEC) are undifferentiated[4].

TC are characterized by a very low proliferation rate and a low rate of malignancy. ATC have an intermediate rate of malignancy: ATC are less aggressive than SCLC but are more destructive than TC. The clinical behavior of ATC depends on the height of the mitotic index and the resulting proliferation rate, which positively correlates with aggressive behavior[4]. Hence, metastases are found more frequently in ATC than in TC, and distant metastases are often already present at the time of ATC diagnosis[5, 6]. Finally, SCLC and LCNEC are very aggressive BP-NEN and are usually associated with a poor prognosis[5, 7].

For TC and ATC, the first-line therapy is curative surgery, leading in general to prolonged long-term survival[8, 9]. In contrast, surgery is recommended for few patients with SCLC and only for those with a limited disease status[7, 10]. In most cases, patients with SCLC display an advanced tumor stage, and systemic chemotherapy with initially high response rates is the standard therapy. The overall 5-year survival rate among patients with SCLC is limited to 5–10% due to early recurrence, whereas the 5-year and 10-year survival rates are 80–90% among patients with TC and 50–70% among patients with ATC[5, 7].

The chemokine receptor CXCR4 is a seven transmembrane G-protein coupled receptor[11]. Physiologically, CXCR4 is expressed by different cells of the hematopoietic system (e.g., T and B lymphocytes, monocytes, and macrophages). The activation of the receptor by its natural ligand CXCL12 (SDF-1, stromal cell derived factor 1) leads to the proliferation of cells and directed migration towards the source of the ligand[12]. Hence, the CXCR4/CXCL12 axis is important for the homing and retention of stem cells and the trafficking of lymphocytes towards the sites of tissue damage or inflammation[13]. The receptor is additionally involved in many physiological processes including embryonic development, hematopoiesis, and angiogenesis[14]. The overexpression of CXCR4 has been found in at least 23 different types of tumors[15]. Hence, CXCR4 is postulated to be involved in tumor progression, metastasis, adaptation to hypoxia, and stem cell survival. Many studies have demonstrated a correlation between CXCR4 expression and tumor aggressiveness with regard to metastatic spread and limited patient overall survival (OS)[16-18]. Additionally, the expression of CXCR4 by cancer cells seems to be associated with malignancy potential and tumor recurrence. Therefore, the CXCR4/CXCL12 axis is a promising target for cancer diagnostics and therapies, which is reflected by the development and application of a

large number of antagonistic CXCR4 ligands.

Plerixafor (AMD3100) has been approved by the United States Food and Drug Administration and in the European Union by the European Medicines Agency for stem cell mobilization[19]. The use of AMD3100 labeled with Gallium-68 in breast cancer-bearing mice demonstrated the potential of CXCR4 antagonists as imaging reagents on the one hand and reflects the significance of CXCR4 as a marker structure in cancer on the other hand[20]. Previously, Gourni et al. presented the first data on the new <sup>68</sup>Ga-labeled high-affinity CXCR4 ligand <sup>68</sup>Ga-CPCR4-2 (cyclo(D-Tyr(1)-[NMe]-D-Orn(2)-[4-(aminomethyl) benzoic acid]), which is characterized by high *in vivo* stability and distinct and specific tumor accumulation[21]. The *in vivo* anti-metastatic efficacy of CXCR4 antagonists, such as TF 14016[22], CTCE-9908[23], and AMD3465[24], has been demonstrated in several animal trials. Some CXCR4 antagonists have even been tested in clinical studies with the aim to treat different kinds of cancers (e.g., hematological cancers and brain tumors[25]).

In contrast to many other tumor entities, the role of CXCR4 expression has not been evaluated in typical and atypical lung carcinoids so far, and there are only limited data available on CXCR4 expression in SCLC[26, 27]. In addition, previous studies investigating the expression of CXCR4 in different tumor entities by immunohistochemistry (IHC) often yielded only cytoplasmic or nuclear staining of this membrane-bound receptor[28, 29]. Therefore, the aim of the present study was the immunohistochemical evaluation of CXCR4 expression in BP-NEN using the monoclonal rabbit anti human CXCR4 antibody UMB-2, which, in contrast to other anti-CXCR4 antibodies, leads predominantly to membranous staining of the receptor. Hence, when evaluating the staining results, only membranous staining was taken into account. Additionally, the immunohistochemical findings were verified at the mRNA level by qRT-PCR. Finally, CXCR4 expression as determined by IHC and qRT-PCR was correlated with patient and clinical data.

## RESULTS

### Clinical data

For all three tumor entities, the mean age of the patients was similar (TC: 59.9±14.9, ATC: 58.3±15.3, SCLC: 59.9±9.4 years; Table 3). The ages of the patients with TC or ATC were more variable than those of the patients with SCLC. Accordingly, the minimum age of the patients with TC or ATC was 18 years, whereas that of the patients with SCLC was 43 years. Most of the patients with TC were female (19 females vs. 7 males), whereas

**Table 1: Immunoreactive score (IRS) of immunohistochemical staining**

| Percentage of positive cells | Intensity of staining | IRS                      |
|------------------------------|-----------------------|--------------------------|
| 0 (no positive cells)        | 0 (no reaction)       | 0–2 (negative)           |
| 1 (< 10% positive cells)     | 1 (mild reaction)     | 3–4 (mild)               |
| 2 (10–50% positive cells)    | 2 (moderate reaction) | 5–8 (moderate)           |
| 3 (50–80% positive cells)    | 3 (intense reaction)  | 9–12 (strongly positive) |
| 4 (> 80% positive cells)     |                       |                          |

**Table 2:  $\Delta$ CT values of CXCR4 mRNA levels and division into quartiles**

| $\Delta$ CT values | mRNA level quartiles |
|--------------------|----------------------|
| 26.00–29.49        | 0                    |
| 29.50–32.99        | 1                    |
| 33.00–36.49        | 2                    |
| 36.50–40.00        | 3                    |

**Table 3: Patient data**

|                                                        | TC    | ATC   | SCLC  |
|--------------------------------------------------------|-------|-------|-------|
| <b>Sex [N]</b>                                         |       |       |       |
| Female                                                 | 19    | 15    | 12    |
| Male                                                   | 7     | 15    | 22    |
| <b>Age [years]</b>                                     |       |       |       |
| Median                                                 | 62.8  | 62.1  | 59.6  |
| Mean                                                   | 59.9  | 58.3  | 59.9  |
| Min                                                    | 18.2  | 18.2  | 43.4  |
| Max                                                    | 81.0  | 76.4  | 79.6  |
| SD                                                     | 14.9  | 15.3  | 9.4   |
| <b>Survival [months]</b>                               |       |       |       |
| Median                                                 | 80.7  | 89.7  | 21.5  |
| Mean                                                   | 80.2  | 80.8  | 32.9  |
| Min                                                    | 3.9   | 3.5   | 0.1   |
| Max                                                    | 129.2 | 137.2 | 119.0 |
| SD                                                     | 31.7  | 41.2  | 32.8  |
| <b>CXCR4 expression [IRS score]</b>                    |       |       |       |
| Median                                                 | 0     | 2     | 9     |
| Mean                                                   | 0.9   | 2.22  | 7.82  |
| Min                                                    | 0     | 0     | 0     |
| Max                                                    | 5     | 11    | 12    |
| SD                                                     | 1.44  | 2.64  | 4.3   |
| <b>CXCR4 mRNA level [<math>\Delta</math>CT values]</b> |       |       |       |
| Median                                                 | 34.8  | 35.6  | 37.9  |
| Mean                                                   | 34.3  | 35.6  | 37.5  |
| Min                                                    | 26.0  | 33.25 | 35.58 |
| Max                                                    | 39.45 | 37.45 | 39.35 |
| SD                                                     | 2.96  | 1.5   | 1.0   |

most of the patients with SCLC were male (22 males vs. 12 females). Men and women were equally distributed among the patients with ATC (15 males vs. 15 females). Supplementary Table 1 presents the available TNM stages. In the TC and SCLC group only primary tumors were included. Within the ATC primary tumors and 3 metastases were enclosed.

### Survival data

Overall, CXCR4 expression in BP-NEN as detected by IHC and qRT-PCR was significantly and inversely correlated with OS (IRS CXCR4 × OS: n=70, r=-0.435, p<0.001; mRNA ΔCt-value CXCR4 × OS: n=56, r=-0.455, p<0.001; Table 4). Within the tumor entity

subgroups, however, no significant association between CXCR4 expression and OS was found.

The mean survival time was higher in the TC (80.2 months) and ATC (80.8 months) subgroups than in the SCLC subgroup (32.9 months; Table 3; Figure 1). The Mann-Whitney-U test revealed a significant association between tumor entity and survival, especially when the TC and ATC subgroups were combined and compared with the SCLC subgroup. There was no significant difference in OS between the TC and AC subgroups (p=0.786), whereas comparisons between the TC and SCLC subgroups and between the ATC and SCLC subgroups revealed highly significant differences (p<0.001 for each comparison).

Accordingly, the Kaplan-Meier-analysis revealed a significant difference in OS among the TC, ATC, and SCLC subgroups (log rank p<0.001; Figure 2).

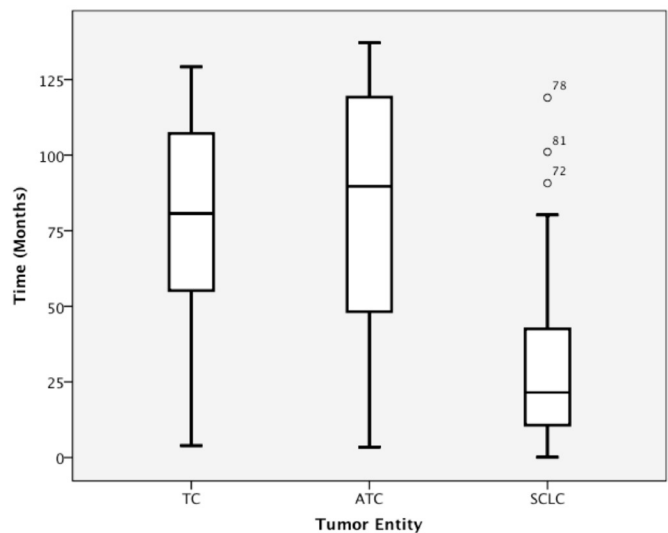

**Figure 1:** Overall survival among patients with TC, ATC, and SCLC.

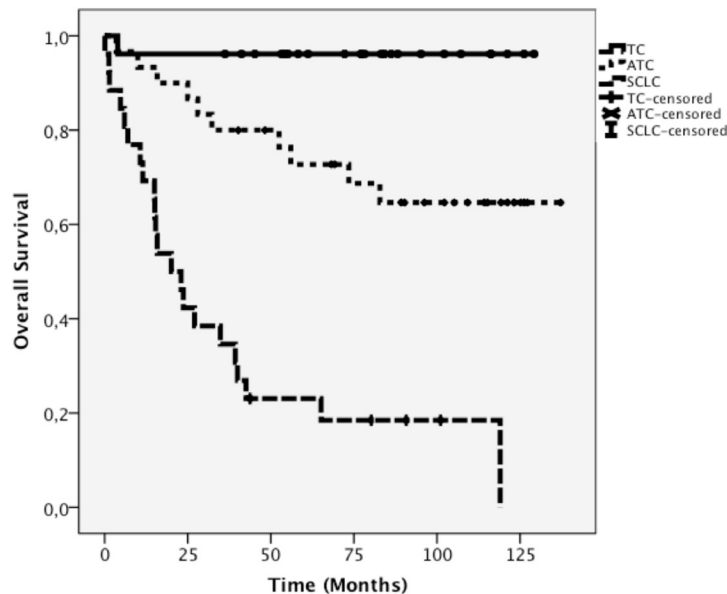

**Figure 2:** Kaplan-Meier curve of overall patient survival for TC, ATC, and SCLC.

**Table 4: Correlation of CXCR4 IRS and  $\Delta$ CT with overall survival**

| IRS / $\Delta$ CT value             | Number of patients   | Correlation (r) | P-value |
|-------------------------------------|----------------------|-----------------|---------|
| IRS CXCR4 $\times$ OS               | N=70 (TC, ATC, SCLC) | -0.435          | <0.001  |
| $\Delta$ CT value CXCR4 $\times$ OS | N=56 (TC, ATC, SCLC) | -0.455          | <0.001  |
|                                     |                      |                 |         |
| IRS CXCR4 $\times$ OS               | N=22 (TC)            | 0.179           | 0.427   |
| $\Delta$ CT value CXCR4 $\times$ OS | N=19 (TC)            | -0.212          | 0.383   |
|                                     |                      |                 |         |
| IRS CXCR4 $\times$ OS               | N=27 (ATC)           | -0.043          | 0.830   |
| $\Delta$ CT value CXCR4 $\times$ OS | N=19 (ATC)           | -0.284          | 0.238   |
|                                     |                      |                 |         |
| IRS CXCR4 $\times$ OS               | N=21 (SCLC)          | -0.016          | 0.944   |
| $\Delta$ CT value CXCR4 $\times$ OS | N=18 (SCLC)          | 0.278           | 0.264   |

**Table 5: CXCR4 expression at the protein and mRNA levels and overall survival in TC, ATC and SCLC**

| Immunohistochemistry TC                 |        |        |                          |
|-----------------------------------------|--------|--------|--------------------------|
| IRS 0–12                                | N = 22 | Events | Median survival [months] |
| IRS 0–4                                 | N=21   | 1      | 86.2                     |
| IRS 5–12                                | N=1    | 0      | 77.2                     |
| CXCR4-mRNA Quartiles TC                 |        |        |                          |
| PCR Quartiles 0–3 ( $\Delta$ CT values) | N=19   | Events | Median survival [months] |
| 0 (26.00–29.49)                         | N=1    | 0      | 126.2                    |
| 1 (29.50–32.99)                         | N=4    | 0      | 90.7                     |
| 2 (33.00–36.49)                         | N=10   | 0      | 80.7                     |
| 3 (36.50–40.00)                         | N=4    | 1      | 77.7                     |
| CXCR4-Immunohistochemistry ATC          |        |        |                          |
| IRS 0–12                                | N=27   | Events | Median survival [months] |
| IRS 0–4                                 | N=23   | 7      | 96.2                     |
| IRS 5–12                                | N=4    | 1      | 62.1                     |
| CXCR4-mRNA Quartiles ATC                |        |        |                          |
| PCR Quartiles 0–3 ( $\Delta$ CT values) | N=19   | Events | Median survival [months] |
| 2 (33.00–36.49)                         | N=12   | 2      | 100.7                    |
| 3 (36.50–40.00)                         | N=7    | 2      | 69.2                     |
| CXCR4-Immunohistochemistry SCLC         |        |        |                          |
| IRS 0–12                                | N=21   | Events | Median survival [months] |
| IRS 0–4                                 | N=3    | 2      | 90.7                     |
| IRS 5–12                                | N=18   | 16     | 17.9                     |
| CXCR4-mRNA Quartiles SCLC               |        |        |                          |
| PCR Quartiles 0–3 ( $\Delta$ CT values) | N=18   | Events | Median survival [months] |
| 2 (33.00–36.49)                         | N=2    | 2      | 63.0                     |
| 3 (36.50–40.00)                         | N=16   | 13     | 17.9                     |

## CXCR4 immunohistochemistry

The IRS of the CXCR4 staining differed significantly among the three tumor entities. The median IRS was 0 (range: 0–5) in the TC subgroup, 2 (range: 0–11) in the ATC subgroup, and 9 (range: 0–12) in the SCLC subgroup (Table 3; Figure 3A).

The receptor expression as detected by IHC was directly associated with OS. Patients with a low IRS (0–4) had significantly higher OS compared with patients with a high IRS (5–12; log-rank  $p < 0.001$ ). Thus, strong CXCR4 staining was directly associated with low OS (Figure 4A).

A low IRS (0–4) was observed in 21/22 patients with TC (median OS=86.2 months), whereas a high IRS (5–12) was found in only one TC patient (OS=77.2 months; Table 5). With ATC a low IRS (0–4) was noticed in 23/27 patients (median OS=96.2 months) and a high IRS (5–12) in 4/27 patients (median OS=62.1 months; Table 5). In only 3/21 of the SCLC patients a low IRS (0–4) could be detected (median OS=90.7 months), whereas a high IRS (5–12) was seen in 18/21 of the cases (median OS=17.9

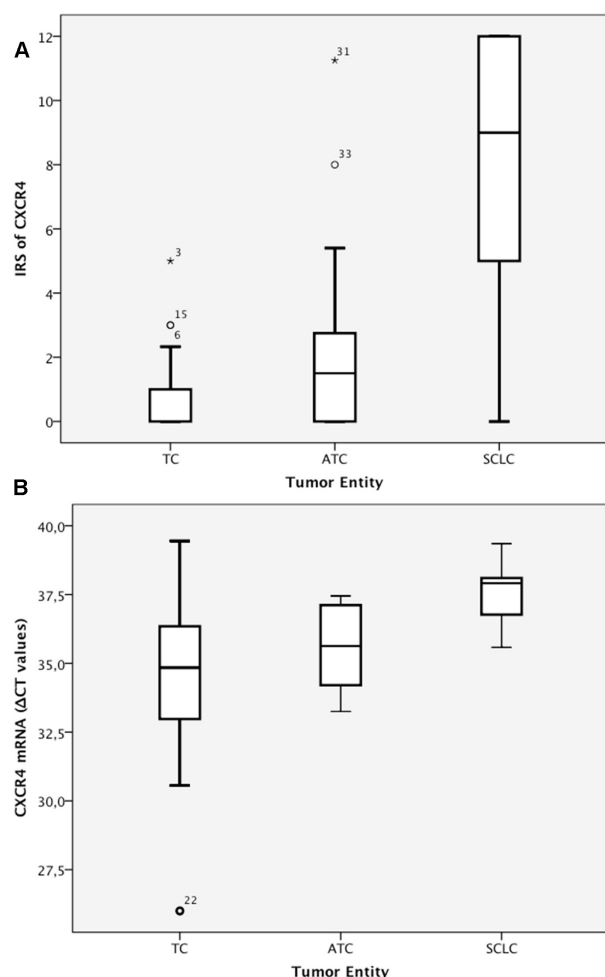

**Figure 3:** A) IRS (0–12) of CXCR4 immunohistochemistry. B) CXCR4 mRNA levels ( $\Delta$ CT values).

months; Table 5). Figure 5 demonstrates the typical immunohistochemical images of CXCR4 expression in TC, ATC and SCLC.

## Gene expression data

In the PCR analysis, the  $\Delta$ CT values differed significantly between the SCLC subgroup on the one hand (median=37.9, range: 35.58–39.35) and the TC and ATC subgroups on the other hand ( $p < 0.001$ ). In contrast, the median mRNA level was not significantly different between the TC subgroup (median=34.8, range: 26.0–39.45) and the ATC subgroup (median=35.6, range: 33.25–37.45;  $p = 0.102$ ; Table 3; Figure 3B).

In the TC subgroup, the two lower quartiles (0 and 1) of the CXCR4 mRNA level comprised only a few patients (quartile 0: 1 of 19  $\triangleq$  5.3%; quartile 1: 4 of 19  $\triangleq$  21%). The majority of the patients in the TC subgroup had moderate mRNA levels (quartile 2: 10 of 19  $\triangleq$  52.6%), and only a few displayed high mRNA levels (quartile 3: 4

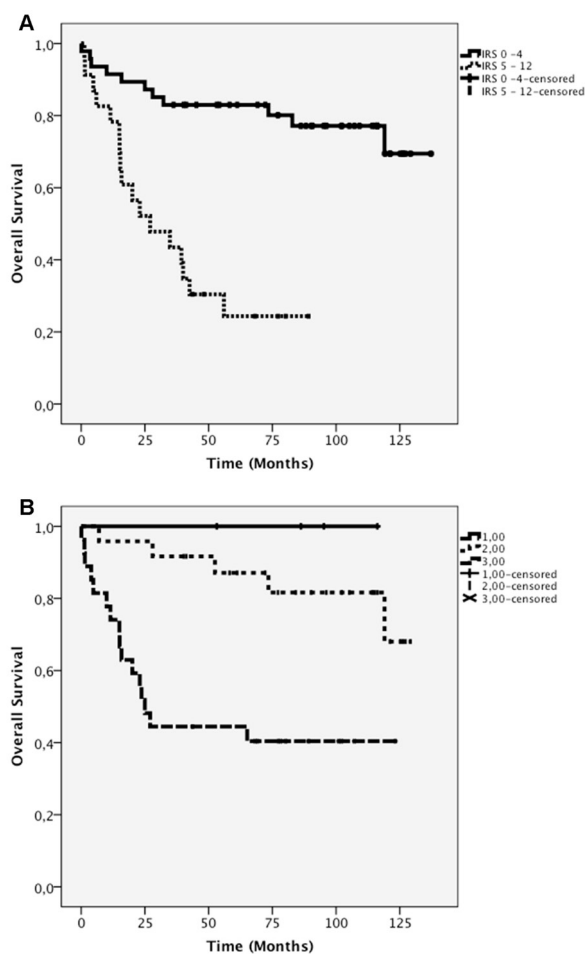

**Figure 4:** A) Kaplan-Meier survival curves for negative-to-mild (IRS 0–4) and moderate-to-strong (IRS 5–12) CXCR4 expression as determined by immunohistochemistry. B) Kaplan-Meier curve of CXCR4 mRNA levels (0–3).

of 19  $\triangleq$  21%). Only one patient in the TC group had died, and that patient's mRNA level was located within quartile 3 ( $\triangleq$  25%; Table 5).

In the ATC subgroup, the majority of the patients had moderate mRNA levels (quartile 2: 12 of 19  $\triangleq$  63%), but some patients showed also high mRNA levels (quartile 3: 7 of 19  $\triangleq$  37%; Table 5). In quartiles 2 and 3, respectively, two patients had died (quartile 2:  $\triangleq$  16.7%, quartile 3:  $\triangleq$  28.6%). The median OS time was 101 months in quartile 2 and 69 months in quartile 3 (Table 5).

In contrast, nearly all of the patients in the SCLC subgroup exhibited high mRNA levels (quartile 3: 16 of 18  $\triangleq$  89%), while some had moderate mRNA levels (quartile 2: 2 of 18  $\triangleq$  11%; Table 5). The majority of the patients with SCLC in quartile 3 had died (n=13  $\triangleq$  81%), and the median OS time in that quartile was only 17.9 months. Both of the patients in quartile 2 had died ( $\triangleq$  100%), but the median OS time in that quartile amounted to 63 months (Table 5).

The data of quartile 0 were excluded from the comparative survival analysis due to the presence of one patient only. The survival curves corresponding to the low and moderate CXCR4 mRNA expression levels (quartiles

1 and 2) were not significantly different from each other (log-rank p=0.457). There was also no significant difference between the survival curves of quartiles 1 and 3 (log-rank p=0.064), whereas a significant difference was found between the survival curves of quartiles 2 and 3 (log-rank p=0.001; Figure 4B).

### Correlation between the immunohistochemistry and qRT-PCR data

Among all the patients, the CXCR4 expression as detected by IHC displayed a significant correlation with the CXCR4 mRNA level (n=51; r=0.691; p<0.001). Within the three tumor subgroups, however, the results were different. In the TC subgroup, there was no correlation between the CXCR4 protein level and the mRNA level (n=17, r=0.109, p=0.676). In the ATC subgroup, a strong trend for an association between the protein and mRNA levels was noticed (n=17, r=0.472, p=0.056) and, finally, in the SCLC subgroup a significant correlation between the CXCR4 protein and mRNA levels could be detected (n=17, r=0.510, p=0.037).

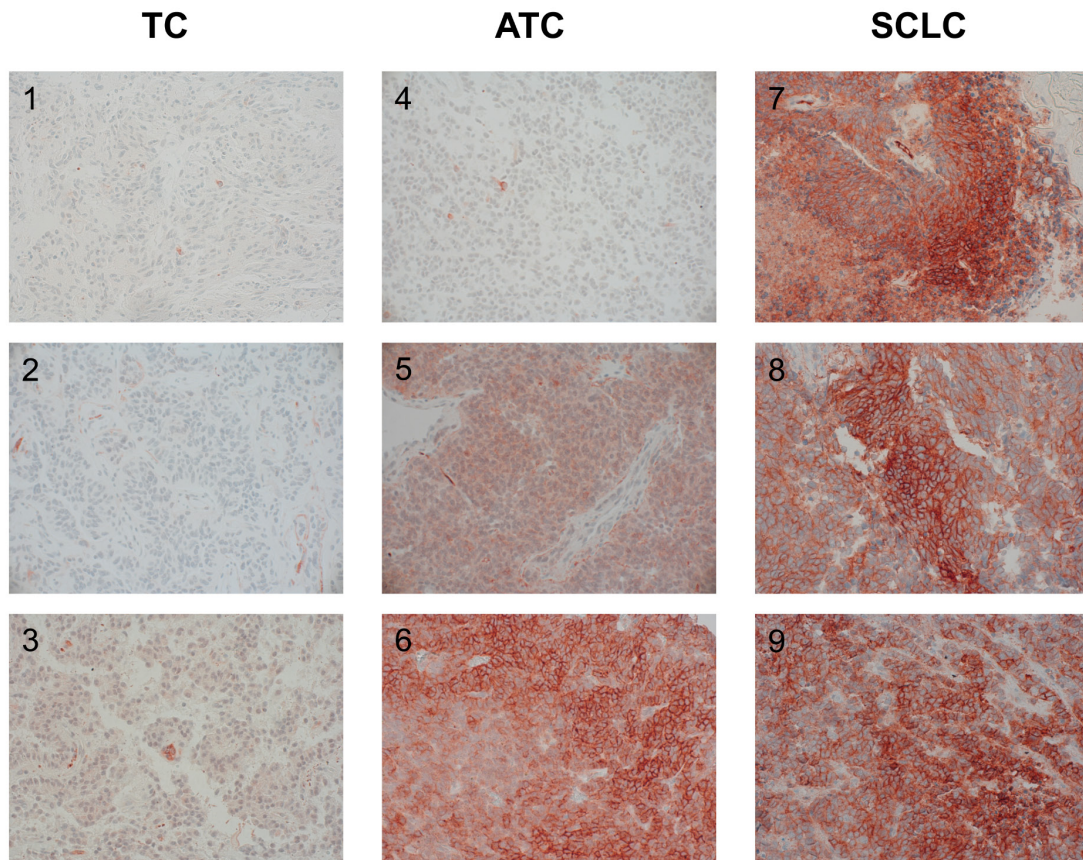

**Figure 5: CXCR4 expression in the tumor samples of 3 patients with TC (1-3), of 3 patients with ATC (4-6), and 3 patients with SCLC (7-9), (immunohistochemistry; original magnification: 400x).**

## DISCUSSION

### Clinical data

The mean age of the patients in each of the three bronchopulmonary tumor entities was within the sixth decade of life, which is in line with that in other studies[9, 30]. TC and ATC also occurred in younger patients, whereas SCLC only affected patients with advanced age. Additionally, the development of SCLC seems to be associated with the male gender. Because the occurrence of SCLC is correlated with cigarette smoking, one reason for the gender bias may be that cigarette smoking is still more common among males than among females. In contrast to that seen in SCLC, a correlation between smoking and the development of pulmonary carcinoids has not been proven so far[8, 31]. Madrid-Carbajal et al., for example, could not find any relationship between tobacco consumption and TC incidence[32]. In our investigation, and in contrast to the other tumor entities, the TC subgroup contained more females than males. From the literature, however, no data are available that support a higher TC incidence in women than in men[30, 33].

### CXCR4 expression and survival data

CXCR4 is widely expressed in different malignant tumor entities. Many studies have found an association between the CXCR4 expression level and fast tumor recurrence as well as poor patient outcomes[34-36].

Among the pulmonary cancer entities, CXCR4 has been shown to be highly expressed in primary and secondary lung cancers[17]. Reports on CXCR4 expression in SCLC and CXCR4 expression levels in pulmonary carcinoids are very limited [26, 27, 37].

In the present study, the CXCR4 expression in BP-NEN was analyzed at the protein level as well as the mRNA level and correlated with survival data for the first time. In TC and ATC, patient survival is not as poor as that in SCLC. CXCR4 expression as detected by IHC (IRS values) differed significantly between patients with TC and those with ATC, whereas the mRNA levels did not. One reason for that discrepancy may be that not necessarily all mRNA is translated into protein. The higher CXCR4 protein levels in ATC compared to those in TC could be responsible for the higher nodal metastasis rate, earlier recurrence, and enhanced aggressiveness of the ATC tumor entity[18, 38]. As shown in previous studies, nodal involvement seems to be a prognostic criterion for tumor recurrence[39]. Metastases and recurrence were described previously, however, for both TC and ATC[6,

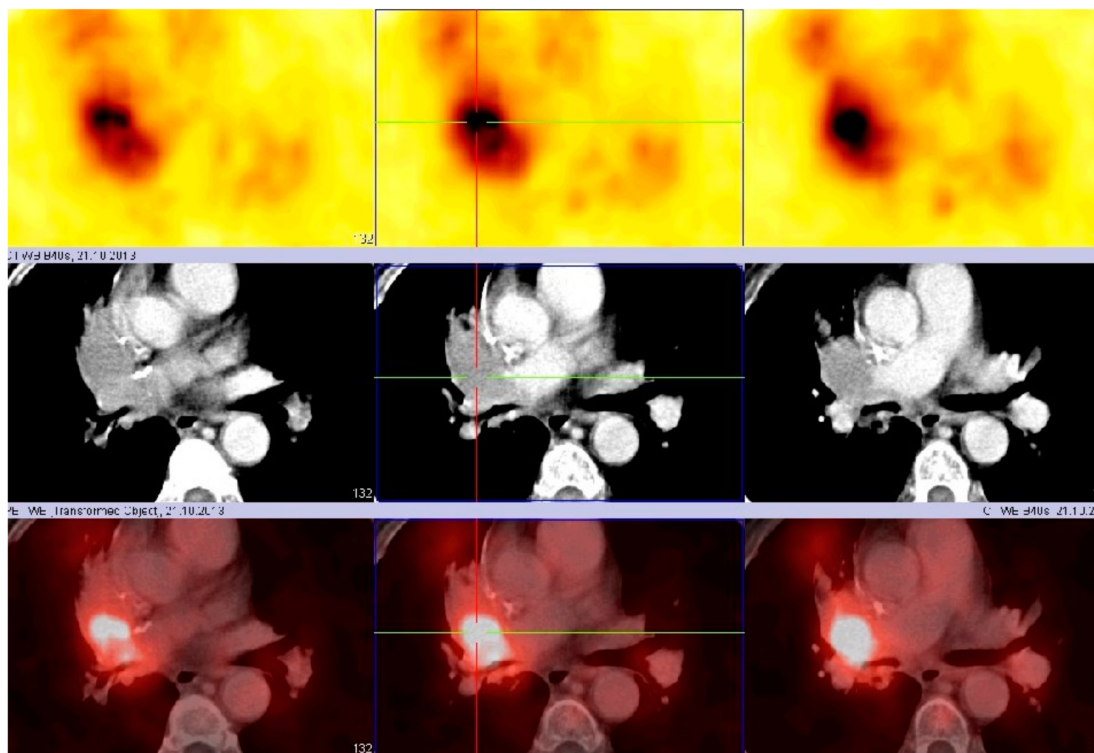

**Figure 6:** <sup>68</sup>Ga-CPCR4-2 PET/CT (transversal images): local recurrence of a centrally localized SCLC (upper panel: PET scan, middle panel: CT scan, lower panel: PET + CT fusion image).



39]. Our clinical survival data are congruent with those investigations. To our knowledge, there are no data sets other than our own that show the CXCR4 expression levels in TC and ATC at the protein level as well as the mRNA level. Hence, our results cannot currently be compared to those of other studies.

Our data show a significant inverse correlation in SCLC between CXCR4 expression as determined by IHC (IRS values) and mRNA levels, respectively, and OS (IRS:  $r=-0.435$ ,  $p<0.001$ ; mRNA:  $r=-0.455$ ,  $p<0.001$ ). Therefore, especially in SCLC, (besides IHC) mRNA analysis could be a useful diagnostic tool.

Hartmann et al. reported high levels of functional CXCR4 in SCLC[27]. Our data completely support those findings. Previous studies have also shown that the CXCR4 ligand CXCL12 is able to induce integrin activation, resulting in increased tumor cell adhesion and metastasis in SCLC. Additionally, CXCR4 seems to be involved in tumor-stroma interactions, thus leading to protection of the SCLC tumor cells from chemotherapy-induced apoptosis. Accordingly, co-treatment with cytotoxic drugs and CXCR4 inhibitors has been recommended[26, 27].

As shown in Figure 4, survival was directly associated with the IHC data and the CXCR4 mRNA level. In our study, increased levels of both CXCR4 protein and CXCR4 mRNA led to decreased patient survival. These findings correspond to the results of many other studies, which demonstrated a relation between CXCR4 expression and poor patient survival[38, 40, 41].

SCLC and ATC with mild or strong CXCR4 expression differed mainly in OS, although not significantly. With a higher number of cases, that result would likely be statistically significant. Overall, our findings suggest a strong correlation between the CXCR4 expression level (as measured by IHC and mRNA level) and OS.

### **CXCR4 immunohistochemistry and PCR data**

With respect to the detection of CXCR4 expression by means of IHC, the specificity of the rabbit monoclonal antibody UMB-2 has been shown in different tumor entities[42]. Also, IHC data based on highly sensitive monoclonal antibodies and PCR data have previously been shown to be comparable[43].

Generally, our IHC and PCR data were significantly correlated with each other ( $r=0.691$ ,  $p<0.001$ ), demonstrating a strong interrelationship between the results of the two methods. With regard to the tumor subgroups, the correlation between the IHC data and the PCR data was only significant in the SCLC subgroup; so the correlation may only exist if the values are high enough.

### **CXCR4-based imaging and treatment**

Receptor-targeted imaging is performed by means of single photon emission computed tomography (SPECT) as well as positron emission tomography (PET) with many different tracers (e.g., Indium-111, Iodine-125, Copper-64, or Gallium-68). A general problem concerning imaging techniques is the accumulation of the used reagent in the liver and kidney. The long synthesis times and the low radiochemical yield when using In-111 or I-125 may cause problems[44]. The usefulness of the CXCR4-2 peptide labeled with Gallium-68 was initially reported by Gourni et al.[21]. The first clinical experience with  $^{68}\text{Ga}$ -CXCR4-2 (prepared in the radiopharmacy of our hospital) PET/CT imaging was very encouraging and demonstrated the clinical applicability and feasibility of using that molecular imaging technique for confirming CXCR4 expression in patients with SCLC; this information can then be used to select patients with high CXCR4 expression for radiopeptide therapy according to the theranostics principle (Figure 6).

The efficacy of AMD3100 as a CXCR4 antagonist has been proven in many studies for many different tumor types[45, 46]. Other antagonistic CXCR4 ligands (e.g., TF14016) have also demonstrated suppression of metastases and anti-angiogenic potential in SCLC[22]. Our IHC and PCR data verified the high CXCR4 expression levels in human SCLC reported previously. In accordance with previous studies, our data provide strong evidence for antagonistic CXCR4 ligands as a promising therapy option in SCLC and highly proliferative ATC[22, 47]. Additional experimental studies are necessary, however, to further substantiate that point of view. In a next step an own retrospective study with a larger number of SCLC cases is planned to further investigate the CXCR4 expression with regard to OS. More data on CXCR4 expression in SCLC are necessary to underline the prognostic relevance in SCLC treatment.

### **CONCLUSIONS**

Bronchopulmonary neuroendocrine tumors (TC, ATC, and SCLC) clearly differed in their CXCR4 expression levels. SCLC displayed very high CXCR4 protein and mRNA expression intensities. TC and ATC, in contrast, exhibited lower or nonexistent CXCR4 expression levels. We showed that increasing CXCR4 protein levels as well as mRNA levels were directly associated with limited OS. Our CXCR4 IHC and PCR data correlated significantly with each other. Highly proliferative ATC and SCLC seem to be suitable and very promising targets for (additional) CXCR4-based imaging as well as for peptide receptor based radionuclide therapy or pharmacotherapy.

## MATERIALS AND METHODS

### Patients and clinical data

Between 2002 and 2011, 1385 patients with lung cancer were operated on in the Zentralklinik Bad Berka and evaluated for bronchopulmonary tumors. Fifty-eight patients with TC and ATC were evaluated. Additionally, 35 patients with histologically proven SCLC who had undergone surgery were chosen randomly from the years 1998–2002. All tumor samples were obtained as paraffin-embedded tissue specimens from the archive of the Laboratory for Pathology and Cytology, Zentralklinik Bad Berka, Germany. Three specimens (2 ATC and 1 SCLC) were excluded from the analysis because of staining artifacts.

All clinical data (age, sex, first diagnosis, follow-up, date of death, and OS) were selected from the patients records and supplemented by the local tumor registry from the Tumorcenter, Erfurt, Germany. Additionally, all TC and ATC samples were histopathologically re-evaluated by a lung-experienced pathologist. The current classification system of BP-NEN is based on two grading systems according the WHO / IASLC (International Association for the Study of Lung Cancer) guidelines[48]. Finally, 26 TC, 30 ATC, and 34 SCLC samples were included in our study. The study was approved by a local ethical committee.

### CXCR4 antibody

The rabbit monoclonal anti-CXCR4 antibody UMB-2 was obtained from Epitomics (Burlingame, CA). The antibody was generated against the amino acid sequence KGKRGGHSSVSTESSESSFHSS, which corresponds to residues 331–352 of the C-terminal tail of the human CXCR4 receptor. UMB-2 was characterized extensively in previous studies[42].

### Immunohistochemistry

Four-micrometer sections were prepared from the paraffin blocks and floated onto positively charged slides. Immunostaining was performed by an indirect peroxidase labeling method as described previously[42]. Briefly, the sections were dewaxed and microwaved in 10 mM citric acid (pH 6.0) for 16 min at 600 W for antigen retrieval. Thereafter, the samples were incubated with UMB-2 at a volumetric ratio of 1:2 overnight at 4°C. Binding of the primary antibody was detected by incubating the samples with a biotinylated secondary antibody, followed by an incubation in a biotinylated avidin-peroxidase solution (Vector ABC “Elite” kit, Vector, Burlingame, CA) and

visualized using 3-amino-9-ethylcarbazole in acetate buffer (BioGenex, San Ramon, CA). The sections were then rinsed, counterstained with Mayer’s hematoxylin, and mounted in Vectamount mounting medium (Vector Laboratories, Burlingame, CA).

### Evaluation of the staining

To evaluate the intensity of the staining, the immunoreactivity score (IRS) according to Remmele and Stegner was used[49]. This score enables the determination of both the intensity of the immunosignal and the percentage of cells showing positive staining. The IRS, which has values between 0 and 12, was calculated as follows: [percentage of positive cells] × [intensity of staining] = IRS. The percentage of positive cells was scored as: no positive cells (0); <10% (1); 10–50% (2); 51–80% (3); >80% (4). The intensity of the staining was scored as: no staining (0); mild (1); moderate (2); strong (3). Only cells showing membranous staining of CXCR4 were scored as positive. For the statistical analysis, the IRS data were further classified into four groups describing negative (IRS 0–2), weak-positive (IRS 3–4), moderate-positive (IRS 5–8), or strong-positive (IRS 9–12) staining (Table 1).

### Gene expression analysis by RNA isolation and quantitative reverse-transcription polymerase chain reaction (qRT-PCR)

Nineteen TC and ATC samples, respectively, as well as 22 SCLC samples were randomly picked for PCR analysis. From those samples, additional sections were stained with hematoxylin and eosin and evaluated by a certified pathologist who recorded the percentage tumor cell content in each of the samples. Prior to RNA isolation, macrodissection of the tumor areas was performed in most of the formalin-fixed paraffin-embedded (FFPE) sections designated for the qRT-PCR with <50% tumor cell content. In all cases, sufficient RNA was isolated from the FFPE specimens for qRT-PCR, as previously described[50]. From each FFPE section (4 µm thick), RNA was isolated using a standardized, fully automated method for isolating total RNA from FFPE tissue based on germanium-coated magnetic beads (XTRAKT RNA kits, STRATIFYER Molecular Pathology GmbH, Cologne, Germany). A liquid-handling robot (XTRAKT XL, STRATIFYER Molecular Pathology GmbH, Cologne, Germany) performed both the nucleic acid extraction including DNase digestion (as described previously in detail)[51] and the subsequent aliquoting for biobanking and pipetting for the molecular assays. The method involves extraction-integrated deparaffinization and DNase I digestion steps. DNA-free total RNA was eluted with 100 µL elution buffer and stored at -80°C. The quality

and quantity of RNA were checked by measuring CALM2 expression as a surrogate for amplifiable mRNA by qRT-PCR[52, 53]. One-step qRT-PCR was applied to assess CXCR4 and CALM2 mRNA expression using gene-specific TaqMan®-based assays. Forty cycles of nucleic acid amplification were applied, and the cycle threshold (CT) 200 of the target gene was identified. Normalized CT values ( $\Delta$ CT) were obtained by subtracting the CT value of the housekeeping gene CALM2 from the CT value of the target gene. The RNA results were then reported as 40- $\Delta$ CT values, which correlate proportionally to the mRNA expression level of the target gene. Samples with average CALM2 CT values < 32 were considered eligible for analysis.

The expression of the target gene, as well as that of the reference gene CALM2, was assessed in triplicate by qRT-PCR using the SuperScript III PLATINUM One-Step Quantitative RT-PCR System (Invitrogen, Karlsruhe, Germany) in a Stratagene Mx3005p (Agilent Technologies, Böblingen, Germany) [52, 53]. A commercially available human reference RNA (Stratagene qPCR Human Reference Total RNA, Agilent Technologies, Waldbronn, Germany) was used as a positive control. No-template controls were assessed in parallel to exclude contamination.

In parallel to the IHC data, the  $\Delta$ CT values were evenly divided into a four-level classification system: negative (0), low (1), moderate (2), and high (3) (Table 2).

## Statistics

The data were analyzed using SPSS for Windows 19.0 (IBM®, USA). After the assessment of a normal distribution, the following tests were used: Spearman's rank correlation, Kruskal-Wallis test, Mann-Whitney-U test, and Kaplan-Meier analysis of OS. Differences among survival curves were analyzed by a log-rank test. A p-value  $\leq 0.05$  was considered significant.

## ACKNOWLEDGEMENTS

The authors thank Dr. H. Göbel (Tumorcenter, Erfurt, Germany) and the staff of the Laboratory of Pathology and Cytology Bad Berka, Germany for excellent technical assistance.

## Source of Funding

The Theranostic Research Center, Zentralklinik Bad Berka, 99437 Bad Berka, Germany provided funding for this research.

## Conflict of Interests

Kaemmerer D. received support for travelling to meetings by the companies Pfizer and Ipsen. All other authors declare no conflict of interests.

## REFERENCES

1. Fazio N, Abdel-Rahman O, Spada F, Galdy S, De Dosso S, Capdevila J and Scarpa A. RAF signaling in neuroendocrine neoplasms: From bench to bedside. *Cancer Treat Rev.* 2014.
2. Modlin IM, Moss SF, Chung DC, Jensen RT and Snyderwine E. Priorities for improving the management of gastroenteropancreatic neuroendocrine tumors. *J Natl Cancer Inst.* 2008; 100(18):1282-1289.
3. Gustafsson BI, Kidd M, Chan A, Malfertheiner MV and Modlin IM. Bronchopulmonary neuroendocrine tumors. *Cancer.* 2008; 113(1):5-21.
4. Horsch D, Sayeg Y, Bonnet R, Kaemmerer D, Presselt N and Baum RP. [Expert dialogue: neuroendocrine tumours of the lungs and gastroenteropancreatic system]. *Pneumologie.* 2012; 66(1):44-48.
5. Naalsund A, Rostad H, Strom EH, Lund MB and Strand TE. Carcinoid lung tumors - incidence, treatment and outcomes: a population-based study. *Eur J Cardiothorac Surg.* 2011; 39(4):565-569.
6. Ferolla P, Daddi N, Urbani M, Semeraro A, Ribacchi R, Giovenali P, Ascani S, De Angelis V, Crino L, Puma F and Daddi G. Tumorlets, multicentric carcinoids, lymph-nodal metastases, and long-term behavior in bronchial carcinoids. *J Thorac Oncol.* 2009; 4(3):383-387.
7. Luchtenborg M, Riaz SP, Lim E, Page R, Baldwin DR, Jakobsen E, Vedsted P, Lind M, Peake MD, Mellemegaard A, Spicer J, Lang-Lazdunski L and Moller H. Survival of patients with small cell lung cancer undergoing lung resection in England, 1998-2009. *Thorax.* 2013; 69(3):269-273.
8. Iglesias M, Belda J, Baldo X, Gimferrer JM, Catalan M, Rubio M and Serra M. [Bronchial carcinoid tumor: a retrospective analysis of 62 surgically treated cases]. *Arch Bronconeumol.* 2004; 40(5):218-221.
9. Cardillo G, Sera F, Di Martino M, Graziano P, Giunti R, Carbone L, Facciolo F and Martelli M. Bronchial carcinoid tumors: nodal status and long-term survival after resection. *Ann Thorac Surg.* 2004; 77(5):1781-1785.
10. Jones CD, Cummings IG, Shipolini AR and McCormack DJ. Does surgery improve prognosis in patients with small-cell lung carcinoma? *Interact Cardiovasc Thorac Surg.* 2013; 16(3):375-380.
11. Zhan W, Liang Z, Zhu A, Kurtkaya S, Shim H, Snyder JP and Liotta DC. Discovery of small molecule CXCR4 antagonists. *J Med Chem.* 2007; 50(23):5655-5664.
12. Teicher BA and Fricker SP. CXCL12 (SDF-1)/CXCR4 pathway in cancer. *Clin Cancer Res.* 2010; 16(11):2927-

2931.

13. Otsuka S and Bebb G. The CXCR4/SDF-1 chemokine receptor axis: a new target therapeutic for non-small cell lung cancer. *J Thorac Oncol.* 2008; 3(12):1379-1383.
14. Faber A, Roderburg C, Wein F, Saffrich R, Seckinger A, Horsch K, Diehlmann A, Wong D, Bridger G, Eckstein V, Ho AD and Wagner W. The many facets of SDF-1 $\alpha$ , CXCR4 agonists and antagonists on hematopoietic progenitor cells. *J Biomed Biotechnol.* 2007; 2007(3):26065.
15. Balkwill F. Cancer and the chemokine network. *Nat Rev Cancer.* 2004; 4(7):540-550.
16. Nikzaban M, Hakhamaneshi MS, Fakhari S, Sheikhesmaili F, Roshani D, Ahsan B, Kamali F and Jalili A. The chemokine receptor CXCR4 is associated with the staging of gastric cancer. *Adv Biomed Res.* 2014; 3:16.
17. Wald O, Shapira OM and Izhar U. CXCR4/CXCL12 axis in non small cell lung cancer (NSCLC) pathologic roles and therapeutic potential. *Theranostics.* 2013; 3(1):26-33.
18. Gao Y, Li C, Nie M, Lu Y, Lin S, Yuan P and Sun X. CXCR4 as a novel predictive biomarker for metastasis and poor prognosis in colorectal cancer. *Tumour Biol.* 2014.
19. Proudfoot AE, Power CA and Schwarz MK. Anti-chemokine small molecule drugs: a promising future? *Expert Opin Investig Drugs.* 2010; 19(3):345-355.
20. Aghanejad A, Jalilian AR, Fazaeli Y, Alirezapoor B, Pouladi M, Beiki D, Maus S and Khalaj A. Synthesis and Evaluation of [(67)Ga]-AMD3100: A Novel Imaging Agent for Targeting the Chemokine Receptor CXCR4. *Sci Pharm.* 2013; 82(1):29-42.
21. Gourni E, Demmer O, Schottelius M, D'Alessandria C, Schulz S, Dijkgraaf I, Schumacher U, Schwaiger M, Kessler H and Wester HJ. PET of CXCR4 expression by a (68)Ga-labeled highly specific targeted contrast agent. *J Nucl Med.* 2011; 52(11):1803-1810.
22. Otani Y, Kijima T, Kohmo S, Oishi S, Minami T, Nagatomo I, Takahashi R, Hirata H, Suzuki M, Inoue K, Takeda Y, Kida H, Tachibana I, Fujii N and Kumanogoh A. Suppression of metastases of small cell lung cancer cells in mice by a peptidic CXCR4 inhibitor TF14016. *FEBS Lett.* 2012; 586(20):3639-3644.
23. Wong D, Kandagatla P, Korz W and Chinni SR. Targeting CXCR4 with CTCE-9908 inhibits prostate tumor metastasis. *BMC Urol.* 2014; 14:12.
24. Ling X, Spaeth E, Chen Y, Shi Y, Zhang W, Schober W, Hail N, Jr., Konopleva M and Andreeff M. The CXCR4 antagonist AMD3465 regulates oncogenic signaling and invasiveness *in vitro* and prevents breast cancer growth and metastasis *in vivo*. *PLoS One.* 2013; 8(3):e58426.
25. Weitzenfeld P and Ben-Baruch A. The chemokine system, and its CCR5 and CXCR4 receptors, as potential targets for personalized therapy in cancer. *Cancer Lett.* 2013.
26. Hartmann TN, Burger JA, Glodek A, Fujii N and Burger M. CXCR4 chemokine receptor and integrin signaling co-operate in mediating adhesion and chemoresistance in small cell lung cancer (SCLC) cells. *Oncogene.* 2005; 24(27):4462-4471.
27. Hartmann TN, Burger M and Burger JA. The role of adhesion molecules and chemokine receptor CXCR4 (CD184) in small cell lung cancer. *J Biol Regul Homeost Agents.* 2004; 18(2):126-130.
28. Spano JP, Andre F, Morat L, Sabatier L, Besse B, Combadiere C, Deterre P, Martin A, Azorin J, Valeyre D, Khayat D, Le Chevalier T and Soria JC. Chemokine receptor CXCR4 and early-stage non-small cell lung cancer: pattern of expression and correlation with outcome. *Ann Oncol.* 2004; 15(4):613-617.
29. Clements D, Markwick LJ, Puri N and Johnson SR. Role of the CXCR4/CXCL12 axis in lymphangioliomyomatosis and angiomyolipoma. *J Immunol.* 2010; 185(3):1812-1821.
30. Filosso PL, Rena O, Donati G, Casadio C, Ruffini E, Papalia E, Oliaro A and Maggi G. Bronchial carcinoid tumors: surgical management and long-term outcome. *J Thorac Cardiovasc Surg.* 2002; 123(2):303-309.
31. Hassan MM, Phan A, Li D, Dagohoy CG, Leary C and Yao JC. Risk factors associated with neuroendocrine tumors: A U.S.-based case-control study. *Int J Cancer.* 2008; 123(4):867-873.
32. Madrid-Carbajal C, Garcia-Clemente M, Pando-Sandoval A, Cubillas Martin H, Gonzalez-Budino T and Casan-Clara P. [Bronchial carcinoid tumor: study of 60 patients]. *Med Clin (Barc).* 2013; 141(2):73-76.
33. Soga J and Yakuwa Y. Bronchopulmonary carcinoids: An analysis of 1,875 reported cases with special reference to a comparison between typical carcinoids and atypical varieties. *Ann Thorac Cardiovasc Surg.* 1999; 5(4):211-219.
34. Iwakiri S, Mino N, Takahashi T, Sonobe M, Nagai S, Okubo K, Wada H, Date H and Miyahara R. Higher expression of chemokine receptor CXCR7 is linked to early and metastatic recurrence in pathological stage I nonsmall cell lung cancer. *Cancer.* 2009; 115(11):2580-2593.
35. Otsuka S, Klimowicz AC, Kopciuk K, Petrillo SK, Konno M, Hao D, Muzik H, Stolte E, Boland W, Morris D, Magliocco AM and Bebb DG. CXCR4 overexpression is associated with poor outcome in females diagnosed with stage IV non-small cell lung cancer. *J Thorac Oncol.* 2011; 6(7):1169-1178.
36. Wagner PL, Hyjek E, Vazquez MF, Meherally D, Liu YF, Chadwick PA, Rengifo T, Sica GL, Port JL, Lee PC, Paul S, Altorki NK and Saqi A. CXCL12 and CXCR4 in adenocarcinoma of the lung: association with metastasis and survival. *J Thorac Cardiovasc Surg.* 2009; 137(3):615-621.
37. Teicher BA. Targets in small cell lung cancer. *Biochem Pharmacol.* 2014; 87(2):211-219.
38. He H, Wang C, Shen Z, Fang Y, Wang X, Chen W, Liu F, Qin X and Sun Y. Upregulated expression of C-X-C chemokine receptor 4 is an independent prognostic

- predictor for patients with gastric cancer. *PLoS One*. 2013; 8(8):e71864.
39. Okoye CC, Jablons DM, Jahan TM, Kukreja J, Cardozo S and Yom SS. Divergent Management Strategies for Typical Versus Atypical Carcinoid Tumors of the Thoracic Cavity. *Am J Clin Oncol*. 2013.
  40. Al Zobair AA, Al Obeidy BF, Yang L, Yang C, Hui Y, Yu H, Zheng F, Yang G, Xie C, Zhou F and Zhou Y. Concomitant overexpression of EGFR and CXCR4 is associated with worse prognosis in a new molecular subtype of non-small cell lung cancer. *Oncol Rep*. 2013; 29(4):1524-1532.
  41. Lv S, Yang Y, Kwon S, Han M, Zhao F, Kang H, Dai C and Wang R. The association of CXCR4 expression with prognosis and clinicopathological indicators in colorectal carcinoma patients: a meta-analysis. *Histopathology*. 2013.
  42. Fischer T, Nagel F, Jacobs S, Stumm R and Schulz S. Reassessment of CXCR4 chemokine receptor expression in human normal and neoplastic tissues using the novel rabbit monoclonal antibody UMB-2. *PLoS One*. 2008; 3(12):e4069.
  43. de Cremoux P, Martin EC, Vincent-Salomon A, Dieras V, Barbaroux C, Liva S, Pouillart P, Sastre-Garau X and Magdelenat H. Quantitative PCR analysis of c-erb B-2 (HER2/neu) gene amplification and comparison with p185(HER2/neu) protein expression in breast cancer drill biopsies. *Int J Cancer*. 1999; 83(2):157-161.
  44. Weiss ID and Jacobson O. Molecular imaging of chemokine receptor CXCR4. *Theranostics*. 2013; 3(1):76-84.
  45. Iwanaga T, Iwasaki Y, Ohashi M, Nunobe S and Iwagami S. [Establishment of a CXCR4-expressing gastric cancer cell line in nude mice and the effect of AMD 3100 on tumor regression]. *Gan To Kagaku Ryoho*. 2007; 34(12):1917-1919.
  46. Saur D, Seidler B, Schneider G, Algul H, Beck R, Senekowitsch-Schmidtke R, Schwaiger M and Schmid RM. CXCR4 expression increases liver and lung metastasis in a mouse model of pancreatic cancer. *Gastroenterology*. 2005; 129(4):1237-1250.
  47. Teicher BA. Targets in small cell lung cancer. *Biochem Pharmacol*. 2013; 87(2):211-219.
  48. Phan AT, Oberg K, Choi J, Harrison LH, Jr., Hassan MM, Strosberg JR, Krenning EP, Kocha W, Woltering EA and Maples WJ. NANETS consensus guideline for the diagnosis and management of neuroendocrine tumors: well-differentiated neuroendocrine tumors of the thorax (includes lung and thymus). *Pancreas*. 2010; 39(6):784-798.
  49. Remmele W and Stegner HE. [Recommendation for uniform definition of an immunoreactive score (IRS) for immunohistochemical estrogen receptor detection (ER-ICA) in breast cancer tissue]. *Pathologe*. 1987; 8(3):138-140.
  50. Pentheroudakis G, Batistatou A, Kalogeras KT, Kronenwett R, Wirtz RM, Bournakis E, Eleftheraki AG, Pectasides D, Bobos M, Papaspirou I, Kamina S, Gogas H, Koutras AK, Pavlidis N and Fountzilias G. Prognostic utility of beta-tubulin isotype III and correlations with other molecular and clinicopathological variables in patients with early breast cancer: a translational Hellenic Cooperative Oncology Group (HeCOG) study. *Breast Cancer Res Treat*. 2011; 127(1):179-193.
  51. Bohmann K, Hennig G, Rogel U, Poremba C, Mueller BM, Fritz P, Stoerkel S and Schaefer KL. RNA extraction from archival formalin-fixed paraffin-embedded tissue: a comparison of manual, semiautomated, and fully automated purification methods. *Clin Chem*. 2009; 55(9):1719-1727.
  52. Atmaca A, Al-Batran SE, Wirtz RM, Werner D, Zirlik S, Wiest G, Eschbach C, Claas S, Hartmann A, Ficker JH, Jager E and Brueckl WM. The validation of estrogen receptor 1 mRNA expression as a predictor of outcome in patients with metastatic non-small cell lung cancer. *Int J Cancer*. 2014; 134(10):2314-2321.
  53. Denkert C, Loibl S, Kronenwett R, Budczies J, von Torne C, Nekljudova V, Darb-Esfahani S, Solbach C, Sinn BV, Petry C, Muller BM, Hilfrich J, Altmann G, Staebler A, Roth C, Ataseven B, et al. RNA-based determination of ESR1 and HER2 expression and response to neoadjuvant chemotherapy. *Ann Oncol*. 2013; 24(3):632-639.
