# Supplementary material for: Differential expression and prognostic value of the chemokine receptor CXCR4 in bronchopulmonary neuroendocrine neoplasms
Source: PubMed Central journal article supplement (PMC4413658; doi:10.18632/oncotarget.3242), 2014-12-30
Supplement: oncotarget-06-3346-s001.pdf [file oncotarget-06-3346-s001.pdf]

## Differential expression and prognostic value of the chemokine receptor CXCR4 in bronchopulmonary neuroendocrine neoplasms

### Supplementary Material

Table 1 Supplement TNM classification

| <b>Specimens</b> | <b>Entity</b> | <b>T</b> | <b>N</b> | <b>M</b> |
|------------------|---------------|----------|----------|----------|
| NEN_L_1          | TC            | nd       | nd       | nd       |
| NEN_L_2          | TC            | T1       | NO       | M0       |
| NEN_L_3          | TC            | T2       | NO       | M0       |
| NEN_L_4          | TC            | T2       | NO       | M0       |
| NEN_L_5          | TC            | T2       | NO       | M0       |
| NEN_L_6          | TC            | T1       | NO       | M0       |
| NEN_L_7          | TC            | nd       | NO       | nd       |
| NEN_L_8          | TC            | T1       | NO       | M0       |
| NEN_L_9          | TC            | nd       | NO       | nd       |
| NEN_L_10         | TC            | T1       | NO       | M0       |
| NEN_L_11         | TC            | T1a      | NO       | M0       |
| NEN_L_12         | TC            | T1a      | N1       | M0       |
| NEN_L_13         | TC            | T1       | NO       | M0       |
| NEN_L_14         | TC            | T1       | NO       | M0       |
| NEN_L_15         | TC            | T1a      | NO       | M0       |
| NEN_L_16         | TC            | nd       | NO       | nd       |
| NEN_L_17         | TC            | nd       | NO       | nd       |
| NEN_L_18         | TC            | T1       | NO       | M0       |
| NEN_L_19         | TC            | T1       | NO       | M0       |
| NEN_L_20         | TC            | T1       | NO       | M0       |
| NEN_L_21         | TC            | T2       | NO       | M0       |
| NEN_L_22         | TC            | nd       | NO       | nd       |
| NEN_L_23         | TC            | T1       | NO       | M0       |
| NEN_L_24         | TC            | nd       | nd       | nd       |
| NEN_L_25         | TC            | nd       | NO       | M1       |
| NEN_L_26         | TC            | T1       | NO       | M0       |
| NEN_L_27         | ATC           | T1       | NO       | M0       |
| NEN_L_28         | ATC           | T4       | N1       | M1       |
| NEN_L_29         | ATC           | T4       | N1       | M1       |
| NEN_L_30         | ATC           | T1       | NO       | M0       |
| NEN_L_31         | ATC           | nd       | NO       | nd       |
| NEN_L_32         | ATC           | nd       | nd       | nd       |
| NEN_L_33         | ATC           | nd       | NO       | M0       |
| NEN_L_34         | ATC           | T2b      | NO       | M1       |
| NEN_L_35         | ATC           | T1       | NO       | M1       |
| NEN_L_36         | ATC           | nd       | NO       | M1       |
| NEN_L_37         | ATC           | T1b      | NO       | M0       |
| NEN_L_38         | ATC           | T1       | NO       | M0       |

|          |      |     |    |    |
|----------|------|-----|----|----|
| NEN_L_39 | ATC  | T2  | NO | M0 |
| NEN_L_40 | ATC  | T2  | NO | M0 |
| NEN_L_41 | ATC  | T2  | NO | M0 |
| NEN_L_42 | ATC  | nd  | nd | nd |
| NEN_L_43 | ATC  | nd  | nd | nd |
| NEN_L_44 | ATC  | T1  | NO | M0 |
| NEN_L_45 | ATC  | nd  | nd | nd |
| NEN_L_46 | ATC  | T2  | N1 | M1 |
| NEN_L_47 | ATC  | nd  | nd | nd |
| NEN_L_48 | ATC  | T2  | N1 | M0 |
| NEN_L_49 | ATC  | T1  | NO | M0 |
| NEN_L_50 | ATC  | T1  | N1 | M1 |
| NEN_L_51 | ATC  | nd  | nd | nd |
| NEN_L_52 | ATC  | nd  | NO | nd |
| NEN_L_53 | ATC  | T2  | N1 | M0 |
| NEN_L_54 | ATC  | nd  | nd | nd |
| NEN_L_55 | ATC  | nd  | NO | nd |
| NEN_L_56 | ATC  | T1  | NO | M0 |
| NEN_L_57 | SCLC | nd  | nd | nd |
| NEN_L_58 | SCLC | nd  | nd | nd |
| NEN_L_59 | SCLC | nd  | nd | nd |
| NEN_L_60 | SCLC | nd  | nd | nd |
| NEN_L_61 | SCLC | nd  | nd | nd |
| NEN_L_62 | SCLC | nd  | nd | nd |
| NEN_L_63 | SCLC | nd  | nd | nd |
| NEN_L_64 | SCLC | nd  | nd | nd |
| NEN_L_65 | SCLC | nd  | nd | nd |
| NEN_L_66 | SCLC | nd  | nd | nd |
| NEN_L_67 | SCLC | nd  | nd | nd |
| NEN_L_68 | SCLC | nd  | nd | nd |
| NEN_L_69 | SCLC | nd  | nd | nd |
| NEN_L_70 | SCLC | nd  | nd | nd |
| NEN_L_71 | SCLC | nd  | nd | nd |
| NEN_L_72 | SCLC | nd  | nd | nd |
| NEN_L_73 | SCLC | T1b | N2 | M1 |
| NEN_L_74 | SCLC | nd  | nd | nd |
| NEN_L_75 | SCLC | nd  | N1 | nd |
| NEN_L_76 | SCLC | nd  | nd | nd |
| NEN_L_77 | SCLC | nd  | nd | nd |
| NEN_L_78 | SCLC | nd  | nd | nd |
| NEN_L_79 | SCLC | T2  | N1 | M0 |
| NEN_L_80 | SCLC | nd  | nd | nd |
| NEN_L_81 | SCLC | T2  | NO | M0 |
| NEN_L_82 | SCLC | nd  | NO | nd |
| NEN_L_83 | SCLC | nd  | nd | nd |
| NEN_L_84 | SCLC | nd  | nd | nd |
| NEN_L_85 | SCLC | nd  | nd | nd |

|          |      |     |    |    |
|----------|------|-----|----|----|
| NEN_L_86 | SCLC | nd  | N0 | nd |
| NEN_L_87 | SCLC | T2b | N1 | M0 |
| NEN_L_88 | SCLC | T2  | N2 | M0 |
| NEN_L_89 | SCLC | nd  | nd | nd |
| NEN_L_90 | SCLC | T1  | N0 | M0 |

nd – no data
